# Supplementary material for: nkx3.2 mutant zebrafish accommodate jaw joint loss through a phenocopy of the head shapes of Paleozoic jawless fish
Source: Oxford University Press journal article supplement (doi:10.1242/jeb.216945), 2020-01-01
Supplement: jeb216945supp.pdf [file jeb216945supp.pdf]

## Supplementary information

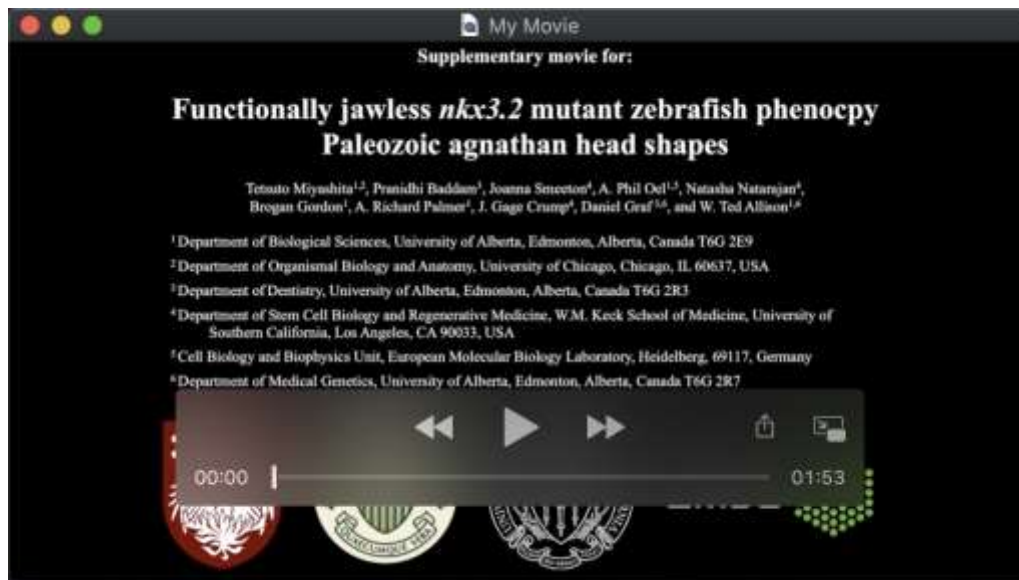

**Movie 1. Feeding behaviour and 3D  $\mu$ CT scans of jawless zebrafish.** Phenotypic comparison of *nkx3.2*<sup>-/-</sup> and wildtype zebrafish. Three-dimensional rendering of  $\mu$ CT scan of the age-matched *nkx3.2*<sup>-/-</sup> (ua5011) and wildtype (AB strain) zebrafish at 2 mpf, each followed by filming of feeding behavior on brine shrimp played at 1/10 original speed.
